# Supplementary material
Source: PubMed Central journal article supplement (PMC3089979)
Supplement: NIHMS279573-supplement-Supp_Tables_1___2.pdf [file NIHMS279573-supplement-Supp_Tables_1___2.pdf]

**Supplemental Table 1 – Frequency of anti-HIV-1 gp140 Env-specific antibody-secreting cells over total IgG memory B cells in chronically HIV-1 infected subjects.**

| <b>Patient ID</b>                                               | <b>Total IgG<br/>ASC/10<sup>6</sup> PBMC</b> | <b>gp140 ASC/10<sup>6</sup><br/>PBMC</b> | <b>% of gp140 ASC<br/>over total ASC</b> |
|-----------------------------------------------------------------|----------------------------------------------|------------------------------------------|------------------------------------------|
| 8982-018                                                        | 0                                            | 0                                        | n/a                                      |
| 8982-019                                                        | 2,619                                        | 4                                        | 0.15                                     |
| 8982-025                                                        | 1,551                                        | 0                                        | 0.00                                     |
| 8982-026                                                        | 2,910                                        | 10                                       | 0.34                                     |
| 8982-028                                                        | 12,500                                       | 18                                       | 0.14                                     |
| 8982-029                                                        | 7,417                                        | 87                                       | 1.17                                     |
| 8982-030                                                        | 15,167                                       | 45                                       | 0.30                                     |
| 8982-036                                                        | 337                                          | 3                                        | 0.89                                     |
| 8982-037                                                        | 25,686                                       | 116                                      | 0.45                                     |
| 8982-038                                                        | 30,742                                       | 0                                        | 0.00                                     |
| 8982-039                                                        | 10,401                                       | 28                                       | 0.27                                     |
| 8982-040                                                        | 5,937                                        | 12                                       | 0.20                                     |
| 8982-041                                                        | 3,656                                        | 14                                       | 0.38                                     |
| 8982-043                                                        | 68                                           | 2                                        | 2.94                                     |
| 8982-044                                                        | 5,176                                        | 39                                       | 0.75                                     |
| 8982-126                                                        | 3,900                                        | 4                                        | 0.10                                     |
| 8982-127                                                        | 12,066                                       | 63                                       | 0.52                                     |
| 8982-128                                                        | 175                                          | 0                                        | 0.00                                     |
| 8982-130                                                        | 233                                          | 2                                        | 0.86                                     |
| 8982-131                                                        | 325                                          | 2                                        | 0.62                                     |
| 8982-132                                                        | 17                                           | 0                                        | 0.00                                     |
| 8982-133                                                        | 25,641                                       | 417                                      | 1.63                                     |
| 8982-134                                                        | 15,091                                       | 104                                      | 0.69                                     |
| 8982-135                                                        | 5,809                                        | 14                                       | 0.24                                     |
| 8982-136                                                        | 5,966                                        | 44                                       | 0.74                                     |
| 8982-137                                                        | 7,441                                        | 3                                        | 0.04                                     |
| <b>Mean ASC/10<sup>6</sup><br/>PBMC</b>                         | <b>7,724</b>                                 | <b>40</b>                                | <b>0.54</b>                              |
| <b>Mean ASC/10<sup>6</sup><br/>PBMC of gp140<br/>responders</b> | <b>8,016</b>                                 | <b>49</b>                                | <b>0.64</b>                              |

**Supplemental Table 2 – MPER gp41 2F5-related epitope-specific plasma antibody levels, reported both as  $\mu\text{g/ml}$  2F5 equivalents and as end-point titers, and memory IgG responses in chronically HIV-1 infected subjects.**

| Patient no. | $\mu\text{g/ml}$ 2F5 Equivalents | End-point titers | ASC/ $10^6$ PBMC |
|-------------|----------------------------------|------------------|------------------|
| 8982-018    | <0.01                            | >1:6.25          | 1                |
| 8982-019    | <0.01                            | >1:6.25          | 0                |
| 8982-025    | <0.01                            | >1:6.25          | 3                |
| 8982-030    | <0.01                            | >1:6.25          | 0                |
| 8982-036    | <b>1.996</b>                     | <b>1:50</b>      | 0                |
| 8982-037    | <0.01                            | >1:6.25          | 0                |
| 8982-038    | <0.01                            | >1:6.25          | 0                |
| 8982-039    | <0.01                            | >1:6.25          | 0                |
| 8982-040    | <b>0.075</b>                     | <b>1:6.25</b>    | 0                |
| 8982-041    | <b>0.069</b>                     | <b>1:6.25</b>    | 0                |
| 8982-126    | <0.01                            | >1:6.25          | 0                |
| 8982-127    | <0.01                            | >1:6.25          | 0                |
| 8982-128    | <0.01                            | >1:6.25          | 0                |
| 8982-130    | <b>1.138</b>                     | <b>1:25</b>      | 0                |
| 8982-131    | <0.01                            | >1:6.25          | 0                |
| 8982-132    | <0.01                            | >1:6.25          | 0                |
| 8982-133    | <0.01                            | >1:6.25          | 0                |
| 8982-134    | <0.01                            | >1:6.25          | 0                |
| 8982-135    | <b>3.425</b>                     | <b>1:100</b>     | 3                |
| 8982-136    | <0.01                            | >1:6.25          | 0                |
| 8982-137    | <0.01                            | >1:6.25          | 0                |

  

Results were considered positive when above 3 times + 3SD the average  $\text{OD}_{405}$  of HIV negative subjects (representative sample in the lower right panel). Five of 21 subjects had detectable levels of MPER gp41 2F5 epitope-specific antibodies.
